# Supplementary material for: Crystal structures of Rea1-MIDAS bound to its ribosome assembly factor ligands resembling integrin–ligand-type complexes
Source: PubMed Central journal article supplement (PMC6624252; doi:10.1038/s41467-019-10922-6), 2019-07-11
Supplement: 41467_2019_10922_MOESM1_ESM.pdf [file 41467_2019_10922_MOESM1_ESM.pdf]

**Crystal structures of Rea1-MIDAS bound to its ribosome assembly factor ligands resembling integrin–ligand-type complexes**

Yasar Luqman Ahmed et al.

**Supplementary Information**

## Supplementary Figures

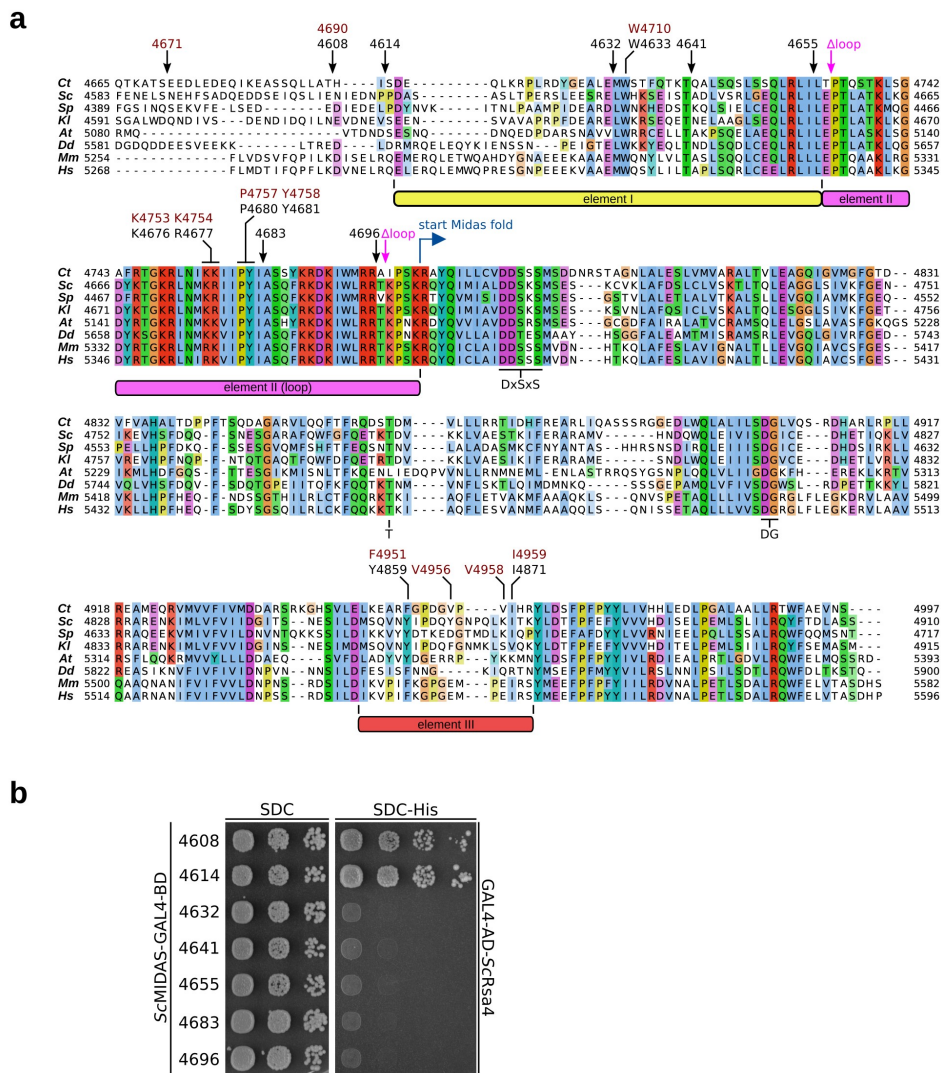

**Supplementary Figure 1 Multiple sequence alignment of the Rea1-MIDAS domain and truncation analysis.** (a) Multiple sequence alignment of the Rea1 with homologs showing the MIDAS domain. The sequences of *Chaetomium thermophilum* (Ct), *Saccharomyces cerevisiae* (Sc), *Schizosaccharomyces pombe* (Sp), *Kluyveromyces lactis* (Kl), *Arabidopsis thaliana* (At), *Dictyostelium discoideum* (Dd), *Mus musculus* (Mm), and *Homo sapiens* (Hs) were aligned with Clustal Omega and visualized with Jalview. The Rea1-specific elements (I–III) and the residues required for coordination of the Mg<sup>2+</sup> ion are highlighted below the alignment. Indicated above the alignment are the generated truncations (arrows) and point mutations in *C.thermophilum* (red) and *S.cerevisiae* (black). The boundaries of the Δloop constructs are indicated in pink. (b) Yeast two-hybrid analysis of the interactions between the indicated MIDAS constructs with full-length Rsa4 from *S. cerevisiae*. The Rsa4 construct was fused to an N-terminal GAL4-AD (activation domain) and the MIDAS constructs were fused to a C-terminal GAL4-BD (binding domain). The residue numbers indicate the N-terminal boundary of the MIDAS constructs. Plasmids were co-transformed into yeast (PJ69-4A) and transformants were spotted in tenfold serial dilutions on SDC (SDC–Leu–Trp) and SDC–His (SDC–Leu–Trp–His) selective plates. Cell growth was monitored after incubation for 3 days at 30 °C.

**a**

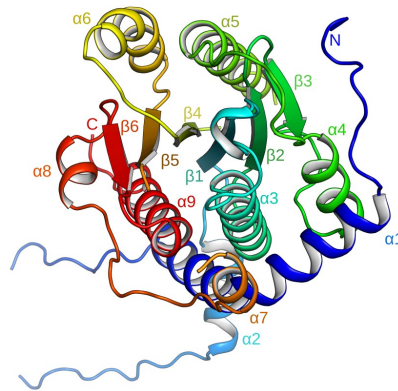

**b**

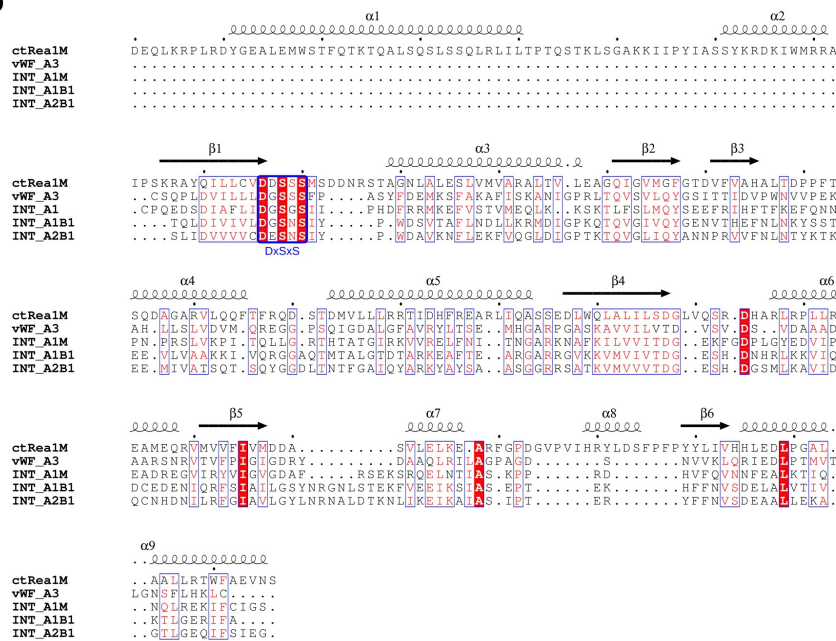

**Supplementary Figure 2. Secondary structure comparison of the Rea1-MIDAS and integrin structures. (a) Structure of the Rea1-MIDAS domain from *C. thermophilum*. (b) Sequence and structure alignment between *CtRea1* and depicted integrin structures. The alignment was created with MAFFTASH. The following structures were aligned: *ctRea1M* (*C. thermophilum* Rea1-MIDAS, sequence contains gaps not covered in the structure), *vWF\_A3* (von Willebrand factor A3 domain, PDB ID: 1AO3), *INT\_A1M* (integrin alpha M I domain, PDB ID: 1MF7), *INT\_A1B1* (integrin alpha1beta1 I-domain, PDB ID: 1QCY) and *INT\_A2B1* (integrin alpha2beta1 I-domain, PDB ID: 5HJ2).**

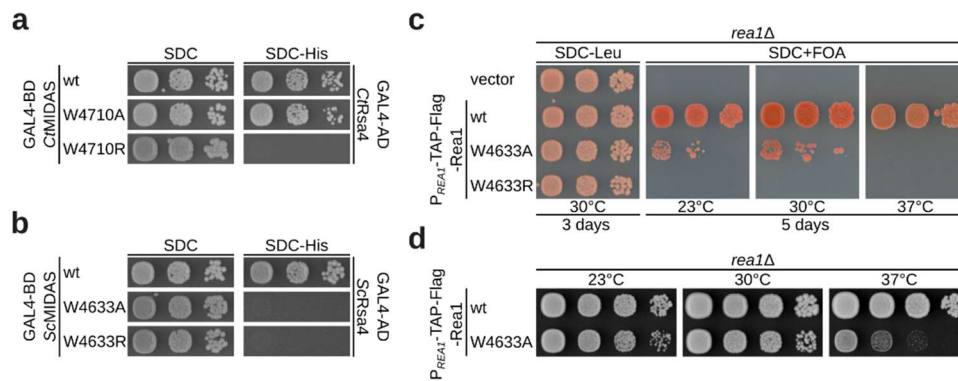

**Supplementary Figure 3. Functional analysis of the conserved Try residue in the N-terminal extension of Rea1-MIDAS. (a,b)** Yeast two-hybrid analysis of the Rea1-MIDAS and Rsa4 constructs from *C. thermophilum* (a) and *S. cerevisiae* (b). The MIDAS constructs were fused to an N-terminal GAL4-BD and the Rsa4 constructs to an N-terminal GAL4-AD. Transformants were spotted on SDC (SDC–Leu–Trp) plates or SDC–His (SDC–Leu–Trp–His) selective plates and cell growth was monitored after incubation for 3 days at 30 °C. (c) An empty plasmid control or the indicated Rea1 constructs, fused to an N-terminal TAP-Flag tag, were transformed into a *rea1Δ* shuffle strain. Cells were spotted in 10-fold serial dilutions on SDC–Leu and SDC+FOA plates and cells were grown at the indicated temperatures for 3 and 5 days, respectively. (d) Growth analysis of the indicated Rea1 constructs after shuffling on SDC+FOA plates. Cells were spotted in tenfold serial dilutions on YPD plates and growth at the indicated temperatures was monitored after 2 days.

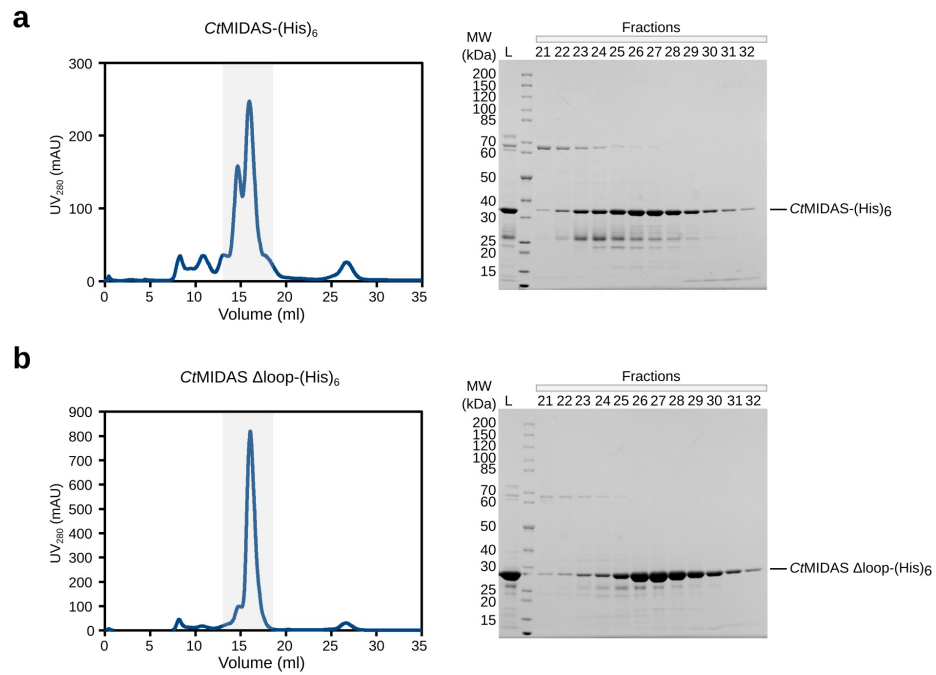

**Supplementary Figure 4. Purification of CtMIDAS and CtMIDAS  $\Delta$ loop.** (a,b) The left-hand panels show the size-exclusion chromatography profiles of CtMIDAS-(His)<sub>6</sub> (amino acids 4690-4997) (a) and CtMIDAS  $\Delta$ loop-(His)<sub>6</sub> (amino acids 4690-4733-GSG-4774-4997) (b). The absorbance at 280 nm (mAU) was plotted against the elution volume (ml). Fractions highlighted in gray were analyzed by SDS-PAGE and Coomassie staining (right-hand panels).

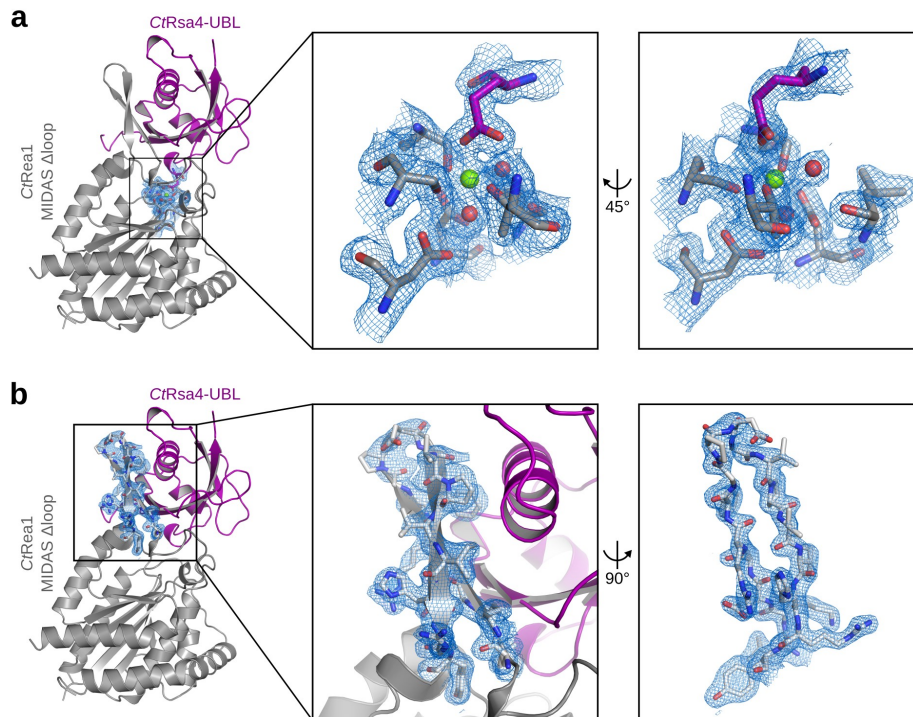

**Supplementary Figure 5. Structure of the CtRea1-MIDAS $\Delta$ loop-CtRsa4-UBL complex.** (a,b) The CtRea1-MIDAS $\Delta$ loop-CtRsa4-UBL model and corresponding electron densities of the Mg<sup>2+</sup> coordination site (a) and the  $\beta$ -hairpin of the Rea1-specific element III (b) contoured at 1.5 and 1.0 sigma, respectively. The CtRsa4-UBL is highlighted in purple and the CtRea1-MIDAS $\Delta$ loop is shown in gray. Close-up views are shown in two orientations.

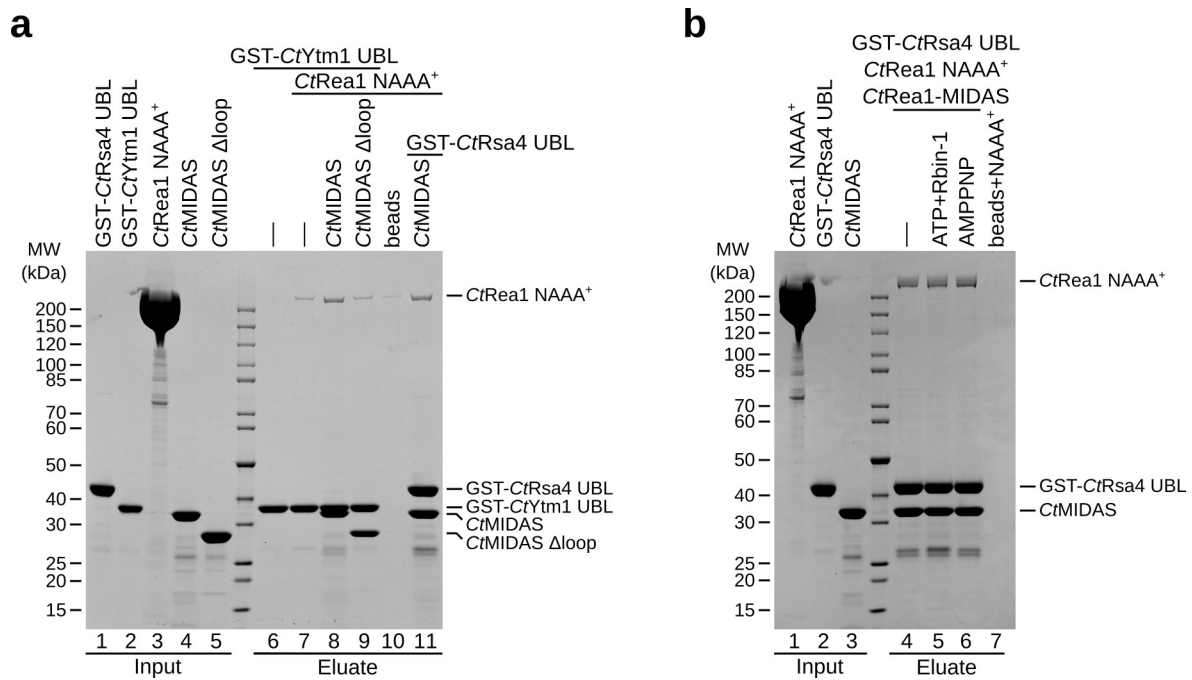

**Supplementary Figure 6. The MIDAS element II loop is required for interaction of the Rea1-MIDAS–Ytm1-UBL complex with the Rea1-AAA<sup>+</sup> ring. (a)** GST-tagged CtYtm1-UBL or CtRsa4-UBL were incubated with CtRea1-MIDAS or CtRea1-MIDAS $\Delta$ loop and the CtRea1-NAAA<sup>+</sup> ring domain. After washing, the GST-tagged CtYtm1- and CtRsa4-UBL domains and bound material were eluted with GSH and analyzed with SDS-PAGE and Coomassie staining. Protein inputs are shown in lanes 1–5, final eluates in lanes 6–11. **(b)** Binding assay between GST-tagged CtRsa4-UBL, CtRea1-MIDAS and Ct-NAAA<sup>+</sup> ring domain in the absence of nucleotides, in presence of ATP (2 mM final concentration) and the inhibitor Rbin-1 (0.1 mM final concentration), or in presence of non-hydrolysable AMPPNP (2 mM final concentration). GST-CtRsa4-UBL and bound material was eluted with GSH and analyzed with SDS-PAGE and Coomassie staining. Protein inputs are shown in lanes 1–3, final eluates in lanes 4–7.

**Supplementary Table 1. *E. coli* expression plasmids used in this study**

| <b>Name</b>                                | <b>Relevant information</b>                                                       | <b>Source</b> |
|--------------------------------------------|-----------------------------------------------------------------------------------|---------------|
| pET24d-CfMIDAS-(His) <sub>6</sub>          | Kan <sup>R</sup> , T7 promoter, <i>lac</i> operator, (aa 4671–4997)               | This study    |
| pETHis-(His) <sub>6</sub> -CfYtm1-UBL      | Kan <sup>R</sup> , T7 promoter, <i>lac</i> operator, (aa 8–98)                    | This study    |
| pETHis-(His) <sub>6</sub> -CfRsa4-UBL      | Kan <sup>R</sup> , T7 promoter, <i>lac</i> operator, (aa 31–128)                  | This study    |
| pET24d-(His) <sub>6</sub> -GST-CfRsa4-UBL  | Kan <sup>R</sup> , T7 promoter, <i>lac</i> operator, (aa 1–128)                   | This study    |
| pET24d-(His) <sub>6</sub> -GST-CfYtm1-UBL  | Kan <sup>R</sup> , T7 promoter, <i>lac</i> operator, (aa 10–98)                   | This study    |
| pET-15b-CfMIDAS-(His) <sub>6</sub>         | Amp <sup>r</sup> , T7 promoter, <i>lac</i> operator, (aa 4690–4997)               | This study    |
| pET-15b-CfMIDASΔloop-(His) <sub>6</sub>    | Amp <sup>r</sup> , T7 promoter, <i>lac</i> operator, (aa 4690–4733-GSG-4774–4997) | This study    |
| pET24d-GST-CfKap104                        | Kan <sup>R</sup> , T7 promoter, <i>lac</i> operator                               | 1             |
| pET-15b-CfSyo1-(His) <sub>6</sub>          | Amp <sup>r</sup> , T7 promoter, <i>lac</i> operator                               | 1             |
| pET-15b-CfMIDAS PY>A-(His) <sub>6</sub>    | Amp <sup>r</sup> , T7 promoter, <i>lac</i> operator, (aa 4690–4997)               | This study    |
| pET-15b-CfMIDAS KK>A-(His) <sub>6</sub>    | Amp <sup>r</sup> , T7 promoter, <i>lac</i> operator, (aa 4690–4997)               | This study    |
| pET-15b-CfMIDAS PY/KK>A-(His) <sub>6</sub> | Amp <sup>r</sup> , T7 promoter, <i>lac</i> operator, (aa 4690–4997)               | This study    |



**Supplementary Table 2. *S. cerevisiae* plasmids used in this study**

| <b>Name</b>                                          | <b>Relevant information</b>                                                          | <b>Source</b>   |
|------------------------------------------------------|--------------------------------------------------------------------------------------|-----------------|
| pVA3-1 (p53)                                         | 2 $\mu$ , <i>TRP1</i> , GAL4 BD-murine p53 (aa 72–390), pGBT9                        | Takara Bio Inc. |
| pTD1-1 (SV40)                                        | 2 $\mu$ , <i>LEU2</i> , GAL4 AD-SV40 large T-antigen (aa 84–708), pACT2              | Takara Bio Inc. |
| YCplac111                                            | CEN, <i>LEU2</i>                                                                     | 2               |
| pGADT7-ScRSA4                                        | 2 $\mu$ , <i>LEU2</i> , <i>PADH1</i> , <i>TADH1</i> , N-terminal GAL4-AD             | 3               |
| pG4BDC22-Gly-aa4608-ScMIDAS                          | CEN, <i>TRP1</i> , <i>PADH1</i> , <i>TADH1</i> , C-terminal GAL4-BD                  | This study      |
| pG4BDC22-aa4614-ScMIDAS                              | CEN, <i>TRP1</i> , <i>PADH1</i> , <i>TADH1</i> , C-terminal GAL4-BD                  | This study      |
| pG4BDC22-Gly-aa4632-ScMIDAS                          | CEN, <i>TRP1</i> , <i>PADH1</i> , <i>TADH1</i> , C-terminal GAL4-BD                  | This study      |
| pG4BDC22-aa4641-ScMIDAS                              | CEN, <i>TRP1</i> , <i>PADH1</i> , <i>TADH1</i> , C-terminal GAL4-BD                  | This study      |
| pG4BDC22-Gly-aa4655-ScMIDAS                          | CEN, <i>TRP1</i> , <i>PADH1</i> , <i>TADH1</i> , C-terminal GAL4-BD                  | This study      |
| pG4BDC22-aa4683-ScMIDAS                              | CEN, <i>TRP1</i> , <i>PADH1</i> , <i>TADH1</i> , C-terminal GAL4-BD                  | This study      |
| pG4BDC22-aa4696-ScMIDAS                              | CEN, <i>TRP1</i> , <i>PADH1</i> , <i>TADH1</i> , C-terminal GAL4-BD                  | This study      |
| pGADT7-CfRSA4                                        | 2 $\mu$ , <i>LEU2</i> , <i>PADH1</i> , <i>TADH1</i> , N-terminal GAL4-AD             | 4               |
| pG4BDN22-aa4690-CfMIDAS                              | CEN, <i>TRP1</i> , <i>PADH1</i> , <i>TADH1</i> , N-terminal GAL4-BD                  | This study      |
| pG4BDN22-aa4690-CfMIDAS $\Delta$ loop                | CEN, <i>TRP1</i> , <i>PADH1</i> , <i>TADH1</i> , N-terminal GAL4-BD                  | This study      |
| pG4BDN22-aa4690-CfMIDAS DAA                          | CEN, <i>TRP1</i> , <i>PADH1</i> , <i>TADH1</i> , N-terminal GAL4-BD                  | This study      |
| pG4BDN22-aa4690-CfMIDAS $\Delta$ loop DAA            | CEN, <i>TRP1</i> , <i>PADH1</i> , <i>TADH1</i> , N-terminal GAL4-BD                  | This study      |
| pG4BDN22-aa4608-ScMIDAS                              | CEN, <i>TRP1</i> , <i>PADH1</i> , <i>TADH1</i> , N-terminal GAL4-BD                  | This study      |
| pG4BDN22-aa4608-ScMIDAS $\Delta$ loop                | CEN, <i>TRP1</i> , <i>PADH1</i> , <i>TADH1</i> , N-terminal GAL4-BD                  | This study      |
| pG4BDN22-aa4608-ScMIDAS DAA                          | CEN, <i>TRP1</i> , <i>PADH1</i> , <i>TADH1</i> , N-terminal GAL4-BD                  | This study      |
| pG4BDN22-aa4608-ScMIDAS $\Delta$ loop DAA            | CEN, <i>TRP1</i> , <i>PADH1</i> , <i>TADH1</i> , N-terminal GAL4-BD                  | This study      |
| pG4BDN22-aa4690-CfMIDAS F4951R                       | CEN, <i>TRP1</i> , <i>PADH1</i> , <i>TADH1</i> , N-terminal GAL4-BD                  | This study      |
| pG4BDN22-aa4690-CfMIDAS F4951A                       | CEN, <i>TRP1</i> , <i>PADH1</i> , <i>TADH1</i> , N-terminal GAL4-BD                  | This study      |
| pG4BDN22-aa4690-CfMIDAS I4959R                       | CEN, <i>TRP1</i> , <i>PADH1</i> , <i>TADH1</i> , N-terminal GAL4-BD                  | This study      |
| pG4BDN22-aa4690-CfMIDAS I4959A                       | CEN, <i>TRP1</i> , <i>PADH1</i> , <i>TADH1</i> , N-terminal GAL4-BD                  | This study      |
| pG4BDN22-aa4690-CfMIDAS V4956R                       | CEN, <i>TRP1</i> , <i>PADH1</i> , <i>TADH1</i> , N-terminal GAL4-BD                  | This study      |
| pG4BDN22-aa4690-CfMIDAS V4956A                       | CEN, <i>TRP1</i> , <i>PADH1</i> , <i>TADH1</i> , N-terminal GAL4-BD                  | This study      |
| pG4BDN22-aa4690-CfMIDAS V4958R                       | CEN, <i>TRP1</i> , <i>PADH1</i> , <i>TADH1</i> , N-terminal GAL4-BD                  | This study      |
| pG4BDN22-aa4690-CfMIDAS V4958A                       | CEN, <i>TRP1</i> , <i>PADH1</i> , <i>TADH1</i> , N-terminal GAL4-BD                  | This study      |
| pG4BDC22-Gly-aa4608-ScMIDAS Y4859R                   | CEN, <i>TRP1</i> , <i>PADH1</i> , <i>TADH1</i> , N-terminal GAL4-BD                  | This study      |
| pG4BDC22-Gly-aa4608-ScMIDAS Y4859A                   | CEN, <i>TRP1</i> , <i>PADH1</i> , <i>TADH1</i> , N-terminal GAL4-BD                  | This study      |
| pG4BDC22-Gly-aa4608-ScMIDAS I4871R                   | CEN, <i>TRP1</i> , <i>PADH1</i> , <i>TADH1</i> , N-terminal GAL4-BD                  | This study      |
| pG4BDC22-Gly-aa4608-ScMIDAS I4871A                   | CEN, <i>TRP1</i> , <i>PADH1</i> , <i>TADH1</i> , N-terminal GAL4-BD                  | This study      |
| pG4BDC22-Gly-aa4608-ScMIDAS Y4859R I4871R            | CEN, <i>TRP1</i> , <i>PADH1</i> , <i>TADH1</i> , N-terminal GAL4-BD                  | This study      |
| pG4BDC22-Gly-aa4608-ScMIDAS Y4859A I4871A            | CEN, <i>TRP1</i> , <i>PADH1</i> , <i>TADH1</i> , N-terminal GAL4-BD                  | This study      |
| YCplac111-PREA1-TAP-Flag-REA1                        | CEN, <i>LEU2</i> , <i>PREA1</i> , <i>TREA1</i> , N-terminal TAP-Flag tag             | 5               |
| YCplac111-PREA1-TAP-Flag- <i>rea1</i> Y4859A         | CEN, <i>LEU2</i> , <i>PREA1</i> , <i>TREA1</i> , N-terminal TAP-Flag tag             | This study      |
| YCplac111-PREA1-TAP-Flag- <i>rea1</i> Y4859R         | CEN, <i>LEU2</i> , <i>PREA1</i> , <i>TREA1</i> , N-terminal TAP-Flag tag             | This study      |
| YCplac111-PREA1-TAP-Flag- <i>rea1</i> I4871A         | CEN, <i>LEU2</i> , <i>PREA1</i> , <i>TREA1</i> , N-terminal TAP-Flag tag             | This study      |
| YCplac111-PREA1-TAP-Flag- <i>rea1</i> I4871R         | CEN, <i>LEU2</i> , <i>PREA1</i> , <i>TREA1</i> , N-terminal TAP-Flag tag             | This study      |
| YCplac111-PREA1-TAP-Flag- <i>rea1</i> Y4859A I4871A  | CEN, <i>LEU2</i> , <i>PREA1</i> , <i>TREA1</i> , N-terminal TAP-Flag tag             | This study      |
| YCplac111-PREA1-TAP-Flag- <i>rea1</i> Y4859R I4871R  | CEN, <i>LEU2</i> , <i>PREA1</i> , <i>TREA1</i> , N-terminal TAP-Flag tag             | This study      |
| pRS314-RSA4                                          | CEN, <i>TRP1</i> , <i>PRSA4</i> , <i>TRSA4</i> ,                                     | 3               |
| pRS314- <i>rsa4</i> -1                               | CEN, <i>TRP1</i> , <i>PRSA4</i> , <i>TRSA4</i> ,                                     | 3               |
| pRS314-YTM1                                          | CEN, <i>TRP1</i> , <i>PYTM1</i> , <i>TYTM1</i> ,                                     | 6               |
| pRS314- <i>ytm1</i> S78L                             | CEN, <i>TRP1</i> , <i>PYTM1</i> , <i>TYTM1</i> ,                                     | 6               |
| YCplac111-PREA1-TAP-Flag- <i>rea1</i> $\Delta$ MIDAS | CEN, <i>LEU2</i> , <i>PREA1</i> , <i>TREA1</i> , N-terminal TAP-Flag tag (aa 1–4621) | This study      |
| YCplac111-PREA1-TAP-Flag- <i>rea1</i> $\Delta$ loop  | CEN, <i>LEU2</i> , <i>PREA1</i> , <i>TREA1</i> , N-terminal TAP-Flag tag             | This study      |

| Name                                                      | Relevant information                                                                 | Source     |
|-----------------------------------------------------------|--------------------------------------------------------------------------------------|------------|
| YCplac111-PREA1-TAP-Flag- <i>rea1</i> DAA                 | CEN, <i>LEU2</i> , <i>PREA1</i> , <i>TREA1</i> , N-terminal TAP-Flag tag             | 5          |
| YCplac111-PGAL1-10-TAP-Flag- <i>REA1</i>                  | CEN, <i>LEU2</i> , <i>PREA1</i> , <i>TREA1</i> , N-terminal TAP-Flag tag             | 5          |
| YCplac111-PGAL1-10-TAP-Flag- <i>rea1</i> ΔMIDAS           | CEN, <i>LEU2</i> , <i>PGAL1-10</i> , <i>TREA1</i> , N-terminal TAP-Flag tag          | This study |
| YCplac111-PGAL1-10-TAP-Flag- <i>rea1</i> Δloop            | CEN, <i>LEU2</i> , <i>PGAL1-10</i> , <i>TREA1</i> , N-terminal TAP-Flag tag          | This study |
| YCplac111-PGAL1-10-TAP-Flag- <i>rea1</i> DAA              | CEN, <i>LEU2</i> , <i>PGAL1-10</i> , <i>TREA1</i> , N-terminal TAP-Flag tag          | This study |
| YCplac111-PREA1-GFP- <i>REA1</i>                          | CEN, <i>LEU2</i> , <i>PREA1</i> , <i>TREA1</i> , N-terminal GFP tag                  | 5          |
| YCplac111-PREA1-GFP- <i>rea1</i> DAA                      | CEN, <i>LEU2</i> , <i>PREA1</i> , <i>TREA1</i> , N-terminal GFP tag                  | 5          |
| YCplac111-PREA1-GFP- <i>rea1</i> ΔMIDAS                   | CEN, <i>LEU2</i> , <i>PREA1</i> , <i>TREA1</i> , N-terminal GFP tag                  | This study |
| YCplac111-PREA1-GFP- <i>rea1</i> Δloop                    | CEN, <i>LEU2</i> , <i>PREA1</i> , <i>TREA1</i> , N-terminal GFP tag                  | This study |
| YCplac111-PADH1-ScMIDAS loop-3xGFP                        | CEN, <i>LEU2</i> , <i>PADH1</i> , <i>TADH1</i> , C-terminal 3xGFP tag                | This study |
| YCplac111-PADH1-CtMIDAS loop-3xGFP                        | CEN, <i>LEU2</i> , <i>PADH1</i> , <i>TADH1</i> , C-terminal 3xGFP tag                | This study |
| YCplac111-PADH1-3xGFP                                     | CEN, <i>LEU2</i> , <i>PADH1</i> , <i>TADH1</i> , C-terminal 3xGFP tag                | 1          |
| YCplac111-PADH1-CtMIDAS loop PY>A-3xGFP                   | CEN, <i>LEU2</i> , <i>PADH1</i> , <i>TADH1</i> , C-terminal 3xGFP tag                | This study |
| YCplac111-PADH1-CtMIDAS loop KK>A-3xGFP                   | CEN, <i>LEU2</i> , <i>PADH1</i> , <i>TADH1</i> , C-terminal 3xGFP tag                | This study |
| YCplac111-PADH1-CtMIDAS loop PY/KK>A-3xGFP                | CEN, <i>LEU2</i> , <i>PADH1</i> , <i>TADH1</i> , C-terminal 3xGFP tag                | This study |
| YCplac111-PADH1-ScMIDAS loop PY>A-3xGFP                   | CEN, <i>LEU2</i> , <i>PADH1</i> , <i>TADH1</i> , C-terminal 3xGFP tag                | This study |
| YCplac111-PADH1-ScMIDAS loop KR>A-3xGFP                   | CEN, <i>LEU2</i> , <i>PADH1</i> , <i>TADH1</i> , C-terminal 3xGFP tag                | This study |
| YCplac111-PADH1-ScMIDAS loop PY/KR>A-3xGFP                | CEN, <i>LEU2</i> , <i>PADH1</i> , <i>TADH1</i> , C-terminal 3xGFP tag                | This study |
| pG4BDN22-aa4608-ScMIDAS loop>L4-PY-NLS                    | CEN, <i>TRP1</i> , <i>PADH1</i> , <i>TADH1</i> , N-terminal GAL4-BD                  | This study |
| pG4BDN22-aa4608-ScMIDAS loop>Hrp1-PY-NLS                  | CEN, <i>TRP1</i> , <i>PADH1</i> , <i>TADH1</i> , N-terminal GAL4-BD                  | This study |
| pG4BDN22-aa4608-ScMIDAS loop>Syo1-PY-NLS                  | CEN, <i>TRP1</i> , <i>PADH1</i> , <i>TADH1</i> , N-terminal GAL4-BD                  | This study |
| YCplac111-PREA1-GFP- <i>rea1</i> loop>L4-PY-NLS           | CEN, <i>LEU2</i> , <i>PREA1</i> , <i>TREA1</i> , N-terminal GFP tag                  | This study |
| YCplac111-PREA1-GFP- <i>rea1</i> loop>Syo1-PY-NLS         | CEN, <i>LEU2</i> , <i>PREA1</i> , <i>TREA1</i> , N-terminal GFP tag                  | This study |
| YCplac111-PREA1-GFP- <i>rea1</i> loop>Hrp1-PY-NLS         | CEN, <i>LEU2</i> , <i>PREA1</i> , <i>TREA1</i> , N-terminal GFP tag                  | This study |
| YCplac111-PREA1-TAP-Flag- <i>rea1</i> loop>L4-PY-NLS      | CEN, <i>LEU2</i> , <i>PREA1</i> , <i>TREA1</i> , N-terminal TAP-Flag tag             | This study |
| YCplac111-PREA1-TAP-Flag- <i>rea1</i> loop>Syo1-PY-NLS    | CEN, <i>LEU2</i> , <i>PREA1</i> , <i>TREA1</i> , N-terminal TAP-Flag tag             | This study |
| YCplac111-PREA1-TAP-Flag- <i>rea1</i> loop>Hrp1-PY-NLS    | CEN, <i>LEU2</i> , <i>PREA1</i> , <i>TREA1</i> , N-terminal TAP-Flag tag             | This study |
| YCplac111-PGAL1-10-TAP-Flag- <i>rea1</i> loop>L4-PY-NLS   | CEN, <i>LEU2</i> , <i>PGAL1-10</i> , <i>TREA1</i> , N-terminal TAP-Flag tag          | This study |
| YCplac111-PGAL1-10-TAP-Flag- <i>rea1</i> loop>Syo1-PY-NLS | CEN, <i>LEU2</i> , <i>PGAL1-10</i> , <i>TREA1</i> , N-terminal TAP-Flag tag          | This study |
| YCplac111-PGAL1-10-TAP-Flag- <i>rea1</i> loop>Hrp1-PY-NLS | CEN, <i>LEU2</i> , <i>PGAL1-10</i> , <i>TREA1</i> , N-terminal TAP-Flag tag          | This study |
| YCplac111-PGAL1-10-GFP- <i>REA1</i>                       | CEN, <i>LEU2</i> , <i>PGAL1-10</i> , <i>TREA1</i> , N-terminal GFP tag               | 5          |
| YCplac111-PGAL1-10-GFP- <i>rea1</i> DAA                   | CEN, <i>LEU2</i> , <i>PGAL1-10</i> , <i>TREA1</i> , N-terminal GFP tag               | 5          |
| YCplac111-PGAL1-10-GFP- <i>rea1</i> loop>Hrp1-PY-NLS      | CEN, <i>LEU2</i> , <i>PGAL1-10</i> , <i>TREA1</i> , N-terminal GFP tag               | This study |
| pADH181-ProtA-TEV-NAAA <sup>+</sup> CtRea1                | 2μ, <i>LEU2</i> , <i>PADH1</i> , <i>TADH1</i> , N-terminal ProtA-TEV tag (aa 1–2390) | This study |

**Supplementary Table 3.** *S. cerevisiae* strains used in this study

| Name                       | Relevant genotype                                                                                                      | Source     |
|----------------------------|------------------------------------------------------------------------------------------------------------------------|------------|
| PJ69-4A                    | <i>trp1-901, leu2-3,112, ura3-52, his3-200, gal4Δ, gal80Δ, LYS2::GAL1-<sup>7</sup>HIS3, GAL2-ADE2, met2::GAL7-lacZ</i> |            |
| W303                       | Wild type, MAT $\alpha$                                                                                                | 8          |
| DS1-2b *                   | Wild type                                                                                                              | 9          |
| <i>rea1Δ</i> shuffle       | <i>rea1::kanMX6, pRS416-REA1</i>                                                                                       | 3          |
| <i>rea1Δ rsa4Δ</i> shuffle | <i>rea1::kanMX6, rsa4::His3MX6, pRS416-REA1, pRS316-RSA4</i>                                                           | 3          |
| <i>rea1Δ ytm1Δ</i> shuffle | <i>rea1::His3MX6, ytm1::hphNT1, pRS416-REA1, pRS316-YTM1</i>                                                           | 6          |
| Aid-HA-REA1                | <i>P<sub>REA1</sub>-Aid-HA::natNT2, P<sub>ADH1</sub>-OsTIR1-9xmyc::TRP1</i>                                            | This study |
| RIX1-TAP RPL3-Flag *       | <i>RIX1-TAP::TRP1, RPL3-Flag::natNT2</i>                                                                               | 5          |

## Supplementary References

1. Kressler, D. *et al.* Synchronizing nuclear import of ribosomal proteins with ribosome assembly. *Science* **338**, 666–671 (2012).
2. Gietz, R. D. & Sugino, A. New yeast-Escherichia coli shuttle vectors constructed with in vitro mutagenized yeast genes lacking six-base pair restriction sites. *Gene* **74**, 527–534 (1988).
3. Ulbrich, C. *et al.* Mechanochemical removal of ribosome biogenesis factors from nascent 60S ribosomal subunits. *Cell* **138**, 911–922 (2009).
4. Baßler, J. *et al.* Interaction network of the ribosome assembly machinery from a eukaryotic thermophile. *Protein Sci. Publ. Protein Soc.* **26**, 327–342 (2017).
5. Matsuo, Y. *et al.* Coupled GTPase and remodelling ATPase activities form a checkpoint for ribosome export. *Nature* **505**, 112–116 (2014).
6. Bassler, J. *et al.* The AAA-ATPase Rea1 drives removal of biogenesis factors during multiple stages of 60S ribosome assembly. *Mol. Cell* **38**, 712–721 (2010).
7. James, P., Halladay, J. & Craig, E. A. Genomic libraries and a host strain designed for highly efficient two-hybrid selection in yeast. *Genetics* **144**, 1425–1436 (1996).
8. Thomas, B. J. & Rothstein, R. Elevated recombination rates in transcriptionally active DNA. *Cell* **56**, 619–630 (1989).
9. Nissan, T. A., Bassler, J., Petfalski, E., Tollervey, D. & Hurt, E. 60S pre-ribosome formation viewed from assembly in the nucleolus until export to the cytoplasm. *EMBO J.* **21**, 5539–5547 (2002).
